# Supplementary material for: Forecasting the new case detection rate of leprosy in four states of Brazil: A comparison of modelling approaches
Source: PubMed Central journal article supplement — Epidemics. Author manuscript; Available in PMC 2018 Oct 23. (PMC6198811; doi:10.1016/j.epidem.2017.01.005), 2017-03
Supplement: NIHMS992284-supplement-s4.pdf [file NIHMS992284-supplement-s4.pdf]

# Forecasting the new case detection rate of leprosy in four states of Brazil: a comparison of modelling approaches

D.J. Blok, R.E. Crump, R. Sundaresh, M. Ndeffo-Mbah, A.P. Galvani,  
T.C. Porco, S.J. de Vlas, G.F. Medley & J.H. Richardus

## S4: Additional figures

D.J. Blok, R.E. Crump, R. Sundaresh, M. Ndeffo-Mbah, A.P. Galvani,  
T.C. Porco, S. de Vlas, G.F. Medley & J.H. Richardus

In the main paper figures are presented illustrating the model fit and distribution of short-term forecasted values for new case detection rate (NCDR) of combined paucibacillary and multibacillary (MB) diagnoses (analyses excluding data after 2011). Here we present equivalent figures for:

- the number of new cases for all diagnoses,
- the number of new cases for MB diagnoses, and
- the NCDR of MB diagnoses.

## List of Figures

|                                                                                                                                                                           |   |
|---------------------------------------------------------------------------------------------------------------------------------------------------------------------------|---|
| S4.1 Comparison of predicted trends from four modelling approaches with the observed numbers of new cases of leprosy in four states of Brazil. . . . .                    | 2 |
| S4.2 Distribution of forecasted numbers of new cases of leprosy in 2012-2014 by state, as predicted by four modelling approaches. . . . .                                 | 2 |
| S4.3 Comparison of predicted trends from four modelling approaches with the observed numbers of new cases of multibacillary leprosy in four states of Brazil. . . . .     | 3 |
| S4.4 Distribution of forecasted numbers of new cases of multibacillary leprosy in 2012-2014 by state, as predicted by four modelling approaches. . . . .                  | 3 |
| S4.5 Comparison of predicted trends from four modelling approaches with the observed new case detection rates of multibacillary leprosy in four states of Brazil. . . . . | 4 |
| S4.6 Distribution of forecasted new case detection rates of multibacillary leprosy in 2012-2014 by state, as predicted by four modelling approaches. . . . .              | 4 |

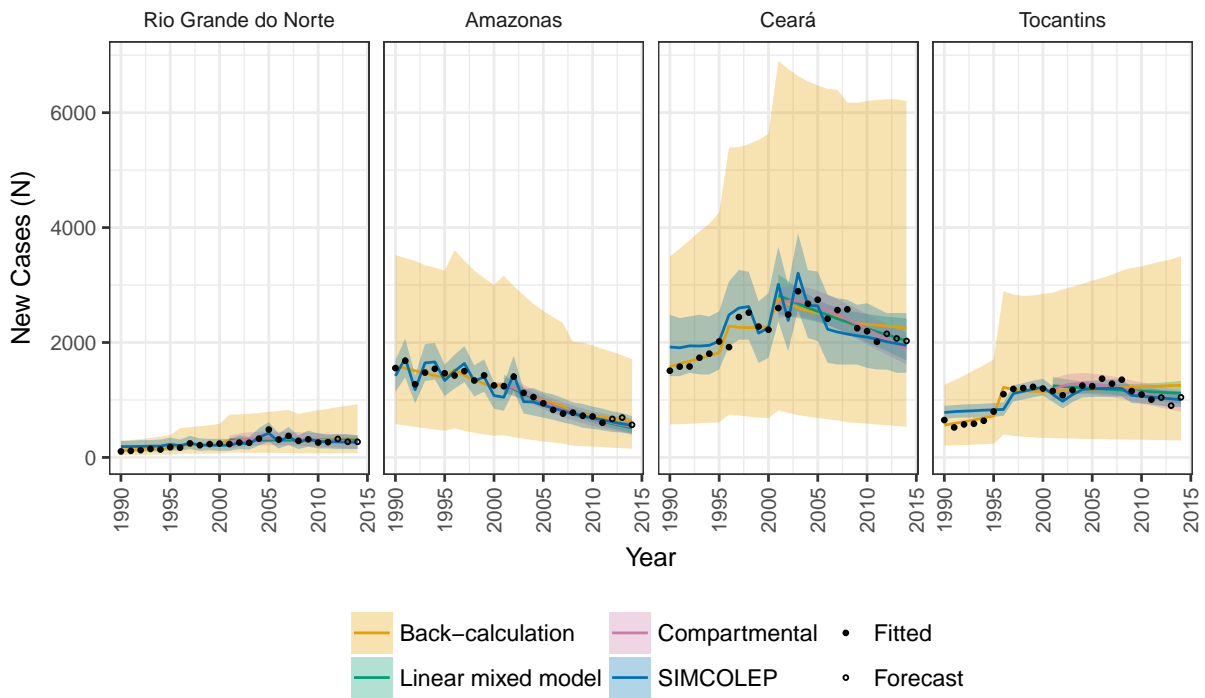

Figure S4.1: Comparison of predicted trends from four modelling approaches with the observed numbers of new cases of leprosy in four states of Brazil. Model outcomes are represented by means (solid lines) and 95% prediction intervals (shaded areas).

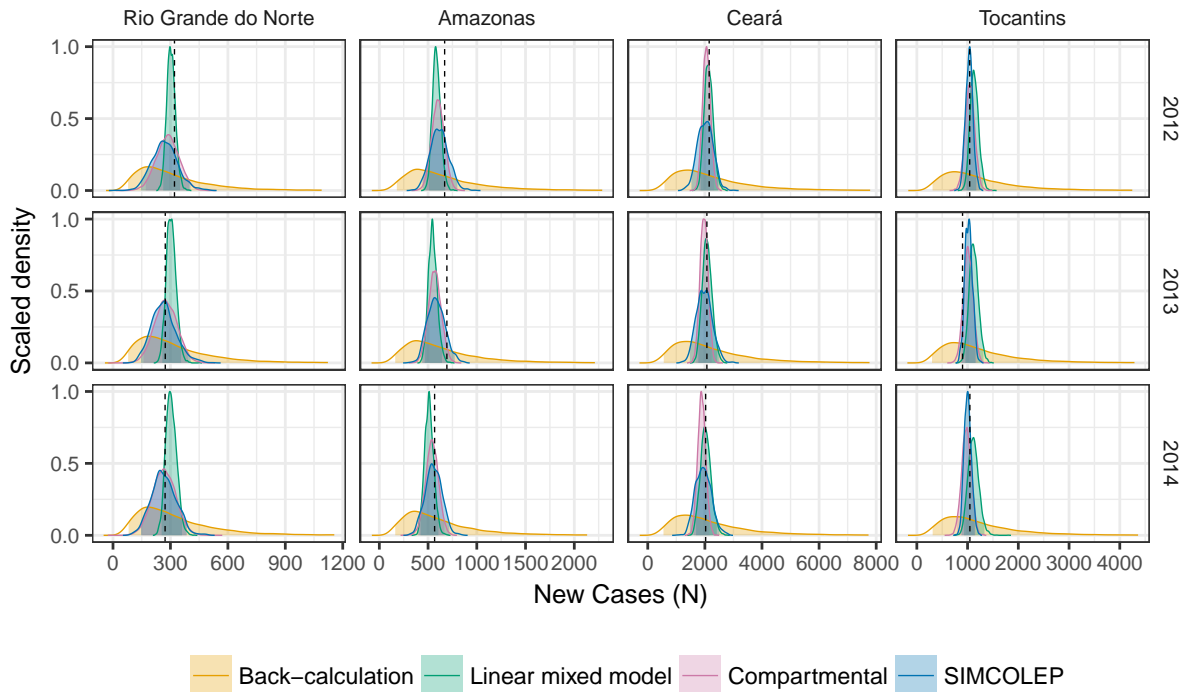

Figure S4.2: Distribution of forecasted numbers of new cases of leprosy in 2012-2014 by state, as predicted by four modelling approaches. The observed value for each state-year combination is indicated by a vertical black dashed line

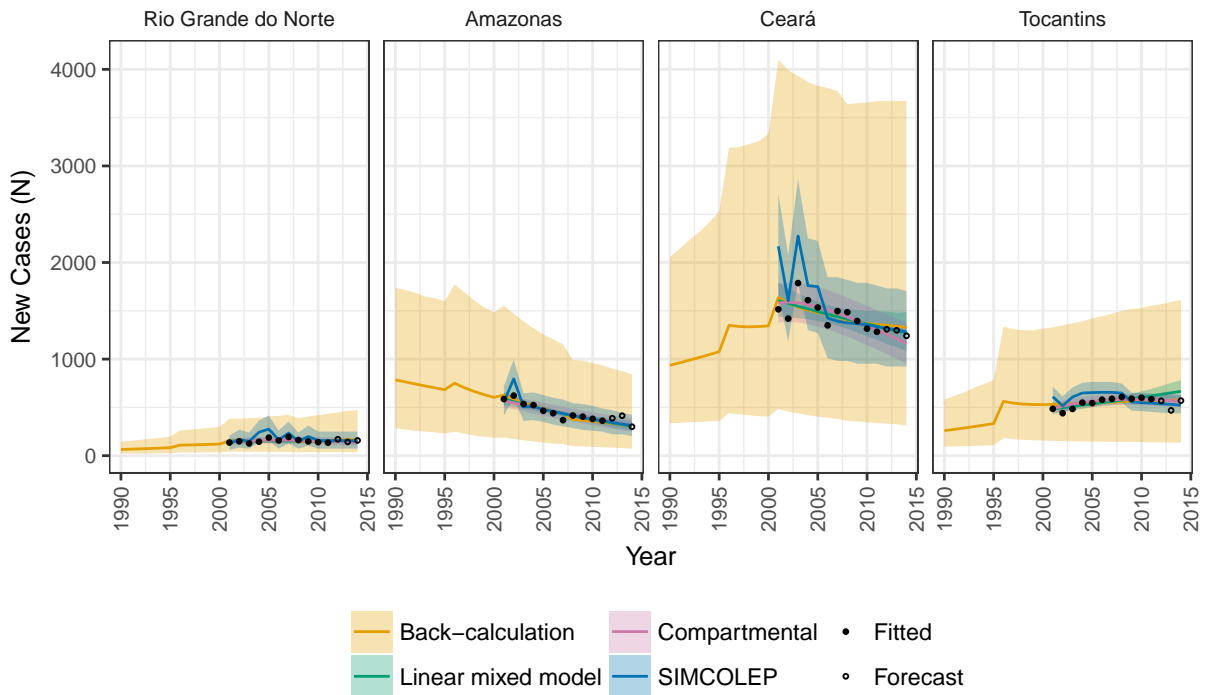

Figure S4.3: Comparison of predicted trends from four modelling approaches with the observed numbers of new cases of multibacillary leprosy in four states of Brazil. Model outcomes are represented by means (solid lines) and 95% prediction intervals (shaded areas).

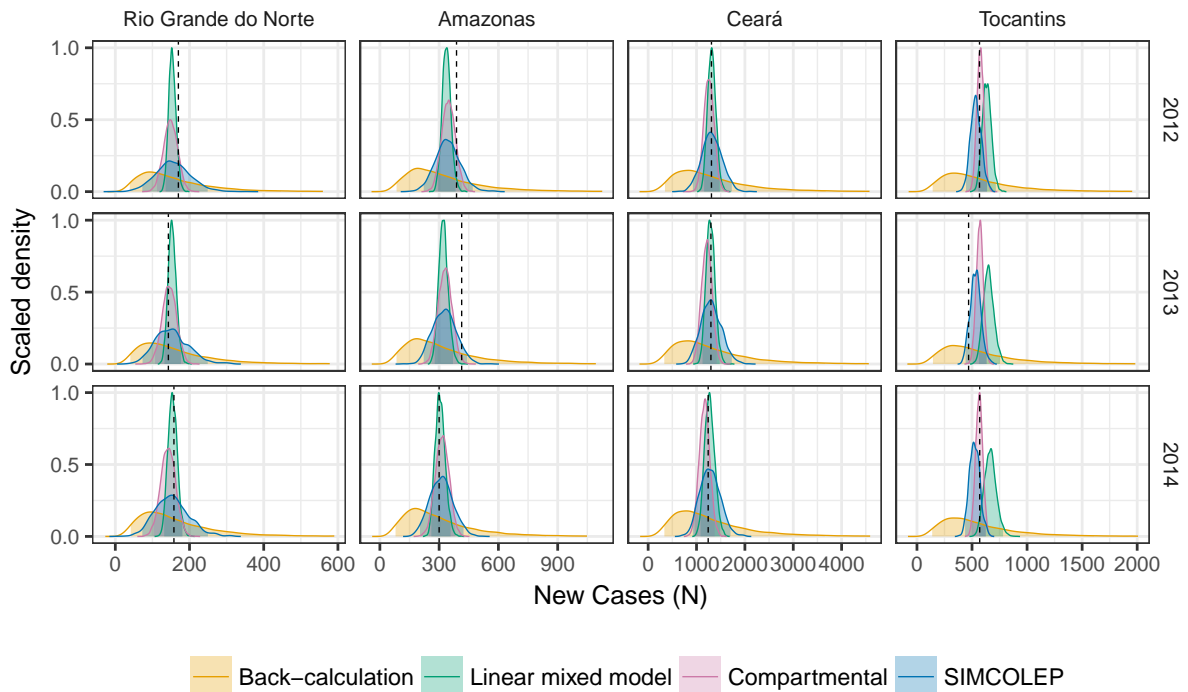

Figure S4.4: Distribution of forecasted numbers of new cases of multibacillary leprosy in 2012-2014 by state, as predicted by four modelling approaches. The observed value for each state-year combination is indicated by a vertical black dashed line

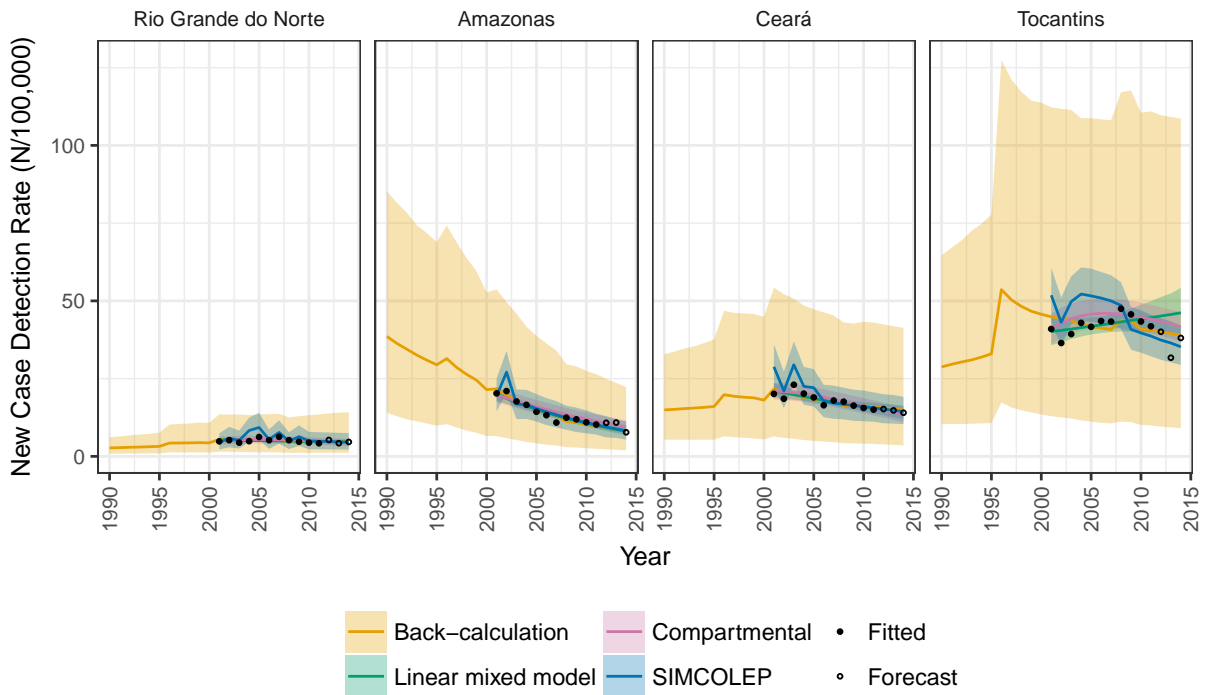

Figure S4.5: Comparison of predicted trends from four modelling approaches with the observed new case detection rates of multibacillary leprosy in four states of Brazil. Model outcomes are represented by means (solid lines) and 95% prediction intervals (shaded areas).

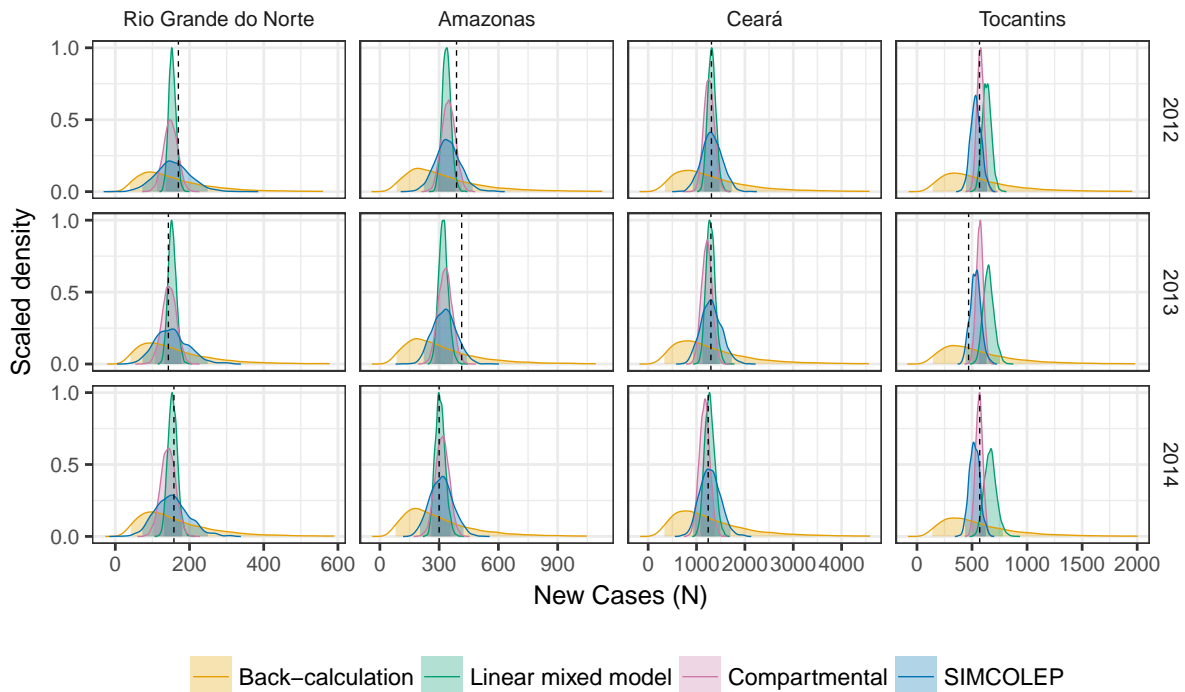

Figure S4.6: Distribution of forecasted new case detection rates of multibacillary leprosy in 2012-2014 by state, as predicted by four modelling approaches. The observed value for each state-year combination is indicated by a vertical black dashed line
